# Supplementary material for: Computer-Controlled Virtual Humans in Patient-Facing Systems: Systematic Review and Meta-Analysis
Source: PubMed Central journal article supplement (PMC7426801; doi:10.2196/18839), 2020-07-30
Supplement: jmir_v22i7e18839_app2.pdf [file jmir_v22i7e18839_app2.pdf]

## Appendix A2

### A2.1 PICOTS information from the 26 studies included in the meta-analysis

**Table A2.1.** PICOTS information from the 26 studies (16 articles) included in the meta-analysis.

| <u>Study</u> | <u>Patient population</u>                                                              | <u>Intervention</u>                                   | <u>Comparator</u>                                | <u>Outcome</u>                                                                                                                                                                                                                                                                                                                                                                                                                                                                                                                                         | <u>Timing</u>                                                                            | <u>Setting</u>          |
|--------------|----------------------------------------------------------------------------------------|-------------------------------------------------------|--------------------------------------------------|--------------------------------------------------------------------------------------------------------------------------------------------------------------------------------------------------------------------------------------------------------------------------------------------------------------------------------------------------------------------------------------------------------------------------------------------------------------------------------------------------------------------------------------------------------|------------------------------------------------------------------------------------------|-------------------------|
| [1]          | women (age ≥ 55 years) with symptoms of overactive bladder (OAB) for at least 3 months | self-management program using virtual humans (n = 22) | self-management program with voice only (n = 19) | <sup>1</sup> self-reported OAB health-related quality of life (OAB HRQOL, [2])<br><sup>2</sup> patient perception of bladder control (PPBC, [3])<br><sup>2</sup> geriatric self-efficacy index for urinary incontinence (GSEI-UI, [4])<br><sup>2</sup> self-reported confidence in doing pelvic floor muscle exercises (PFMEs)<br><sup>2</sup> self-reported ability to suppress urge<br><sup>2</sup> urinary frequency/ 24 h<br><sup>2</sup> urinary urgency / 24 h<br><sup>2</sup> urge incontinence/ 24 h<br><sup>2</sup> night-time urination/ day | 12-week with interventions at weeks 1, 6, and 12; duration of intervention: 15 – 45 mins | outpatient; independent |
| [5]          | healthy adults (age ≥ 18 years); 45% with                                              |                                                       | consent document explained by a <i>human</i>     |                                                                                                                                                                                                                                                                                                                                                                                                                                                                                                                                                        | one-time intervention;                                                                   |                         |

| <u>Study</u> | <u>Patient population</u>                                                       | <u>Intervention</u>                                                                            | <u>Comparator</u>                                     | <u>Outcome</u>                                                                 | <u>Timing</u>                                                    | <u>Setting</u>                 |
|--------------|---------------------------------------------------------------------------------|------------------------------------------------------------------------------------------------|-------------------------------------------------------|--------------------------------------------------------------------------------|------------------------------------------------------------------|--------------------------------|
|              | inadequate health literacy                                                      |                                                                                                | ( <i>n</i> = 9)                                       | <sup>1</sup> level of comprehension of the consent document based on BICEP [6] | duration of intervention: open-ended                             |                                |
|              |                                                                                 |                                                                                                | consent document read by <i>self</i> ( <i>n</i> = 11) |                                                                                |                                                                  |                                |
|              |                                                                                 |                                                                                                | human                                                 | <sup>2</sup> likelihood to sign the consent document                           |                                                                  |                                |
|              |                                                                                 | consent document explained by a virtual human ( <i>n</i> = 9)                                  | self                                                  |                                                                                |                                                                  |                                |
|              |                                                                                 |                                                                                                | human                                                 | <sup>2</sup> overall satisfaction with the consent process                     |                                                                  | at home or research laboratory |
|              |                                                                                 |                                                                                                | self                                                  |                                                                                |                                                                  |                                |
|              |                                                                                 |                                                                                                | human                                                 | <sup>2</sup> perceived pressure to sign the consent document                   |                                                                  |                                |
|              |                                                                                 |                                                                                                | self                                                  |                                                                                |                                                                  |                                |
|              |                                                                                 |                                                                                                | self                                                  | <sup>2</sup> number of questions or clarifications requested                   |                                                                  |                                |
|              |                                                                                 | virtual human promoting physical activity ( <i>n</i> = 30)                                     |                                                       |                                                                                |                                                                  |                                |
|              |                                                                                 | virtual human promoting fruit and vegetable consumption ( <i>n</i> = 27)                       |                                                       | <sup>1</sup> pedometer steps                                                   |                                                                  |                                |
| [7]          | healthy adults (age ≥ 18 years); all participants were provided with pedometers | virtual human promoting physical activity and fruit and vegetable consumption ( <i>n</i> = 27) | no virtual human ( <i>n</i> = 27)                     |                                                                                | 2-month intervention daily; duration of intervention: open-ended | at home; independent           |
|              |                                                                                 | activity                                                                                       |                                                       | <sup>1</sup> NIH/NCI Fruit and vegetable scan (FVS; [8])                       |                                                                  |                                |
|              |                                                                                 | consumption                                                                                    |                                                       |                                                                                |                                                                  |                                |
|              |                                                                                 | activity + consumption                                                                         |                                                       |                                                                                |                                                                  |                                |
|              |                                                                                 | activity                                                                                       |                                                       | <sup>2</sup> BMI                                                               |                                                                  |                                |
|              |                                                                                 | consumption                                                                                    |                                                       |                                                                                |                                                                  |                                |
|              |                                                                                 | activity + consumption                                                                         |                                                       |                                                                                |                                                                  |                                |

| <u>Study</u> | <u>Patient population</u>                                                       | <u>Intervention</u>                                         | <u>Comparator</u>                                             | <u>Outcome</u>                                                                                                                                            | <u>Timing</u>                                       | <u>Setting</u>                                                                                                   |
|--------------|---------------------------------------------------------------------------------|-------------------------------------------------------------|---------------------------------------------------------------|-----------------------------------------------------------------------------------------------------------------------------------------------------------|-----------------------------------------------------|------------------------------------------------------------------------------------------------------------------|
| [9]          | healthy older adults (age ≥ 65); all participants were provided with pedometers | virtual human promoting physical activity ( <i>n</i> = 100) | no virtual human ( <i>n</i> = 100)                            | <sup>1</sup> average daily steps for 30 days before the end of intervention                                                                               | 12 months                                           | at home using personal tablet computers for first 2 months, then using a kiosk computer during outpatient visits |
|              |                                                                                 | virtual human promoting physical activity ( <i>n</i> = 73)  | no virtual human ( <i>n</i> = 55)                             | <sup>2</sup> average steps per day for 30 days before the end of 2 months                                                                                 |                                                     |                                                                                                                  |
| [10]         | adults (age ≥ 18 years); 98% with a current cancer diagnosis                    | search engine using a virtual human ( <i>n</i> = 42)        | conventional facet- and keyword-based search ( <i>n</i> = 45) | <sup>1</sup> find a correct clinical trial                                                                                                                | one-time intervention lasting about 8 to 12 minutes | at home or research laboratory                                                                                   |
| [11]         | adults with depression                                                          | Help4Mood ( <i>n</i> = 12)                                  | in-person treatment with therapist ( <i>n</i> = 9)            | <sup>1</sup> BDI-2 [12]<br><sup>1</sup> QIDS-SR [13]<br><sup>1</sup> DAS-SF2 [14]<br><sup>1</sup> EQ-5D-5L VAS [15]<br><sup>1</sup> EQ-5D-5L Utility [15] | four weeks                                          | at home with a laptop computer provided by the researchers                                                       |
| [16]         | primipara, pregnant women in the third trimester with one fetus (age ≥ 18)      | virtual human ( <i>n</i> = 7)                               | no virtual human ( <i>n</i> = 8)                              | <sup>1</sup> attitudes toward breastfeeding (IIFAS; [17])                                                                                                 | one-time intervention                               | at prenatal outpatient office visit                                                                              |
|              |                                                                                 | virtual human ( <i>n</i> = 6)                               | no virtual human ( <i>n</i> = 7)                              |                                                                                                                                                           | duration of hospital stay post childbirth           | at hospital discharge after childbirth                                                                           |

| <u>Study</u> | <u>Patient population</u>                                                                | <u>Intervention</u>                                    | <u>Comparator</u>                                  | <u>Outcome</u>                                                                                                                        | <u>Timing</u>                                                    | <u>Setting</u>                      |
|--------------|------------------------------------------------------------------------------------------|--------------------------------------------------------|----------------------------------------------------|---------------------------------------------------------------------------------------------------------------------------------------|------------------------------------------------------------------|-------------------------------------|
| [18]         | healthy adults (age ≥ 18)                                                                | motivational interviewing with virtual human (n = 162) | motivational interviewing with text only (n = 146) | <sup>1</sup> number of weekly days with at least 30 minutes of moderate physical activity [19]                                        | one-time intervention; assessment at one-month post intervention |                                     |
| [20]         | older adults (age ≥ 55) not currently engaged in moderate-intensity or moderate activity | virtual human (n = 20)                                 | no virtual human (n = 19)                          | <sup>1</sup> change in walking behavior, weekly amount of walking over the 4 weeks before the end of intervention in minutes per week | 4 months                                                         | at a senior center                  |
| [21]         | US Military service members (active duty)                                                | virtual human interviewer (n = 24)                     | post-deployment health assessment (PDHA; n = 24)   | <sup>1</sup> number of PTSD symptoms reported                                                                                         | one-time intervention                                            | at study site                       |
|              | US Military service members (active duty and veterans)                                   | virtual human interviewer (n = 126)                    | anonymized PDHA (n = 24)                           |                                                                                                                                       |                                                                  |                                     |
| [22]         | healthy adults (age ≥ 18)                                                                | virtual human with indexed stories (n = 35)            | text only interface with indexed stories (n = 26)  | <sup>1</sup> weight-loss self-efficacy [23]                                                                                           | one-time intervention; duration of intervention: open-ended      | online via Amazon's Mechanical Turk |
|              |                                                                                          | virtual human with random stories (n = 19)             | text only interface with random stories (n = 23)   | <sup>1</sup> weight-loss decisional balance [24]                                                                                      |                                                                  |                                     |
|              |                                                                                          |                                                        |                                                    | <sup>1</sup> weight-loss self-efficacy [23]                                                                                           |                                                                  |                                     |
| [25]         |                                                                                          | virtual humans showing emotions (n = 20)               | static images showing emotions                     | <sup>1</sup> weight-loss decisional balance [24]                                                                                      | one-time intervention                                            |                                     |

| <u>Study</u> | <u>Patient population</u>                            | <u>Intervention</u>                                        | <u>Comparator</u>                                                                            | <u>Outcome</u>                                                                                                                                                                                                                                                                                    | <u>Timing</u>                                                      | <u>Setting</u>                         |
|--------------|------------------------------------------------------|------------------------------------------------------------|----------------------------------------------------------------------------------------------|---------------------------------------------------------------------------------------------------------------------------------------------------------------------------------------------------------------------------------------------------------------------------------------------------|--------------------------------------------------------------------|----------------------------------------|
|              | adults with schizophrenia (age ≥ 18)                 |                                                            | ( <i>n</i> = 20)                                                                             | <sup>1</sup> successful emotion recognition—happiness<br><sup>1</sup> successful emotion recognition—sadness<br><sup>1</sup> successful emotion recognition—fear<br><sup>1</sup> successful emotion recognition—surprise                                                                          |                                                                    | at a research laboratory               |
| [26]         | adults with schizophrenia (age ≥ 18)                 | social skills training with virtual human ( <i>n</i> = 33) | social skills training with no virtual human ( <i>n</i> = 31)                                | <sup>1</sup> SBS (overall skill; [27])<br><sup>1</sup> Vocal skill<br><sup>1</sup> Nonverbal skill<br><sup>1</sup> Conversational skill<br><sup>2</sup> Rathus Assertiveness Schedule [28]<br><sup>2</sup> Relationship Change Scale [29]<br><sup>2</sup> Social Problem Solving Inventory-R [30] | 10 semiweekly sessions for five weeks                              | with therapists at an outpatient visit |
| [31]         | male adults with type 2 diabetes mellitus (age ≥ 18) | virtual human based instruction ( <i>n</i> = 30)           | text-based ( <i>n</i> = 30)<br>voice based ( <i>n</i> = 30)<br>static image ( <i>n</i> = 30) | <sup>1</sup> medication knowledge recall                                                                                                                                                                                                                                                          | one-time intervention; assessment two weeks after the intervention | at a research laboratory               |
| [32]         | healthy adults (age ≥ 18 years)                      | virtual human promoting physical exercise ( <i>n</i> = 9)  | no virtual human; <i>text-only</i> interface ( <i>n</i> = 13)                                | <sup>1</sup> self-reported attitude toward exercise                                                                                                                                                                                                                                               | one-time intervention; duration of                                 | at a research laboratory               |

| <u>Study</u> | <u>Patient population</u>                         | <u>Intervention</u>                                                           | <u>Comparator</u>                                                                       | <u>Outcome</u>                                                                                                                          | <u>Timing</u>                                                                    | <u>Setting</u>                                     |
|--------------|---------------------------------------------------|-------------------------------------------------------------------------------|-----------------------------------------------------------------------------------------|-----------------------------------------------------------------------------------------------------------------------------------------|----------------------------------------------------------------------------------|----------------------------------------------------|
|              |                                                   |                                                                               | no virtual human; <i>text-only</i> interface with <i>social</i> dialog ( <i>n</i> = 12) |                                                                                                                                         | intervention:<br>open-ended                                                      |                                                    |
|              |                                                   | virtual human promoting physical exercise with social dialog ( <i>n</i> = 13) | text-only<br>text-only + social                                                         |                                                                                                                                         |                                                                                  |                                                    |
| [33]         | adults suffering from chronic pain and depression | group medical visits and virtual human ( <i>n</i> = 75)                       | group medical visits ( <i>n</i> = 79)                                                   | <sup>1</sup> self-reported stress management behaviors at 9 weeks<br><sup>1</sup> self-reported stress management behaviors at 21 weeks | 9 weeks of group medical visits and 21 weeks of virtual human based intervention | tablet computer provided to the intervention group |

<sup>1</sup>primary outcomes, <sup>2</sup>secondary outcomes; only health-oriented outcomes were considered for the meta-analysis

## A2.2 Meta-analysis of data from 26 studies (66 outcomes)

A three-level model did not capture a significant amount of variability in the data ( $P > .05$ ). Thus, a two-level model was used to pool the effect sizes of 66 outcomes (44 primary and 22 secondary). The between-study heterogeneity of the data was moderate,  $\tau^2 = .15$ ,  $I^2 = 49.2\%$ . Subgroup analyses for health-related *outcomes* [1,7,9,11,18,20,21,25,26,31,33] and health-related *attitudes* were conducted [5,10,16,22,32]. A significant difference was found in the overall effect between the outcome types,  $P = .030$ .

Meta-analysis of data from 26 studies (66 outcomes) revealed a significant difference between intervention and control conditions favoring the virtual human intervention,  $SMD = .134$ , 95% CI = .023, .245, 95% prediction interval =  $-.651, .918$ ,  $P = .019$ , but with evidence of some heterogeneity,  $I^2 = 49.2\%$ , 95% CI = 32.4, 61.8 (Figure A2.2).

A subgroup analysis of the 9 studies (20 outcomes) on health-related attitudes also revealed a significant difference between intervention and control conditions favoring the virtual human intervention,  $SMD = .360$ , 95% CI = .103, .616, 95% prediction interval =  $-.619, 1.338$ ,  $P = .008$ , but with evidence of some heterogeneity,  $I^2 = 36.5\%$ , 95% CI = 0, 62.9.

However, a subgroup analysis of the 17 studies (46 outcomes) on health outcomes did not find a significant difference between intervention and control conditions,  $P = .269$ .

**Figure A2.2.** Forest plot of the meta-analysis of health-related virtual human interventions from 26 studies: 44 primary (blue) and 22 secondary outcomes (grey).

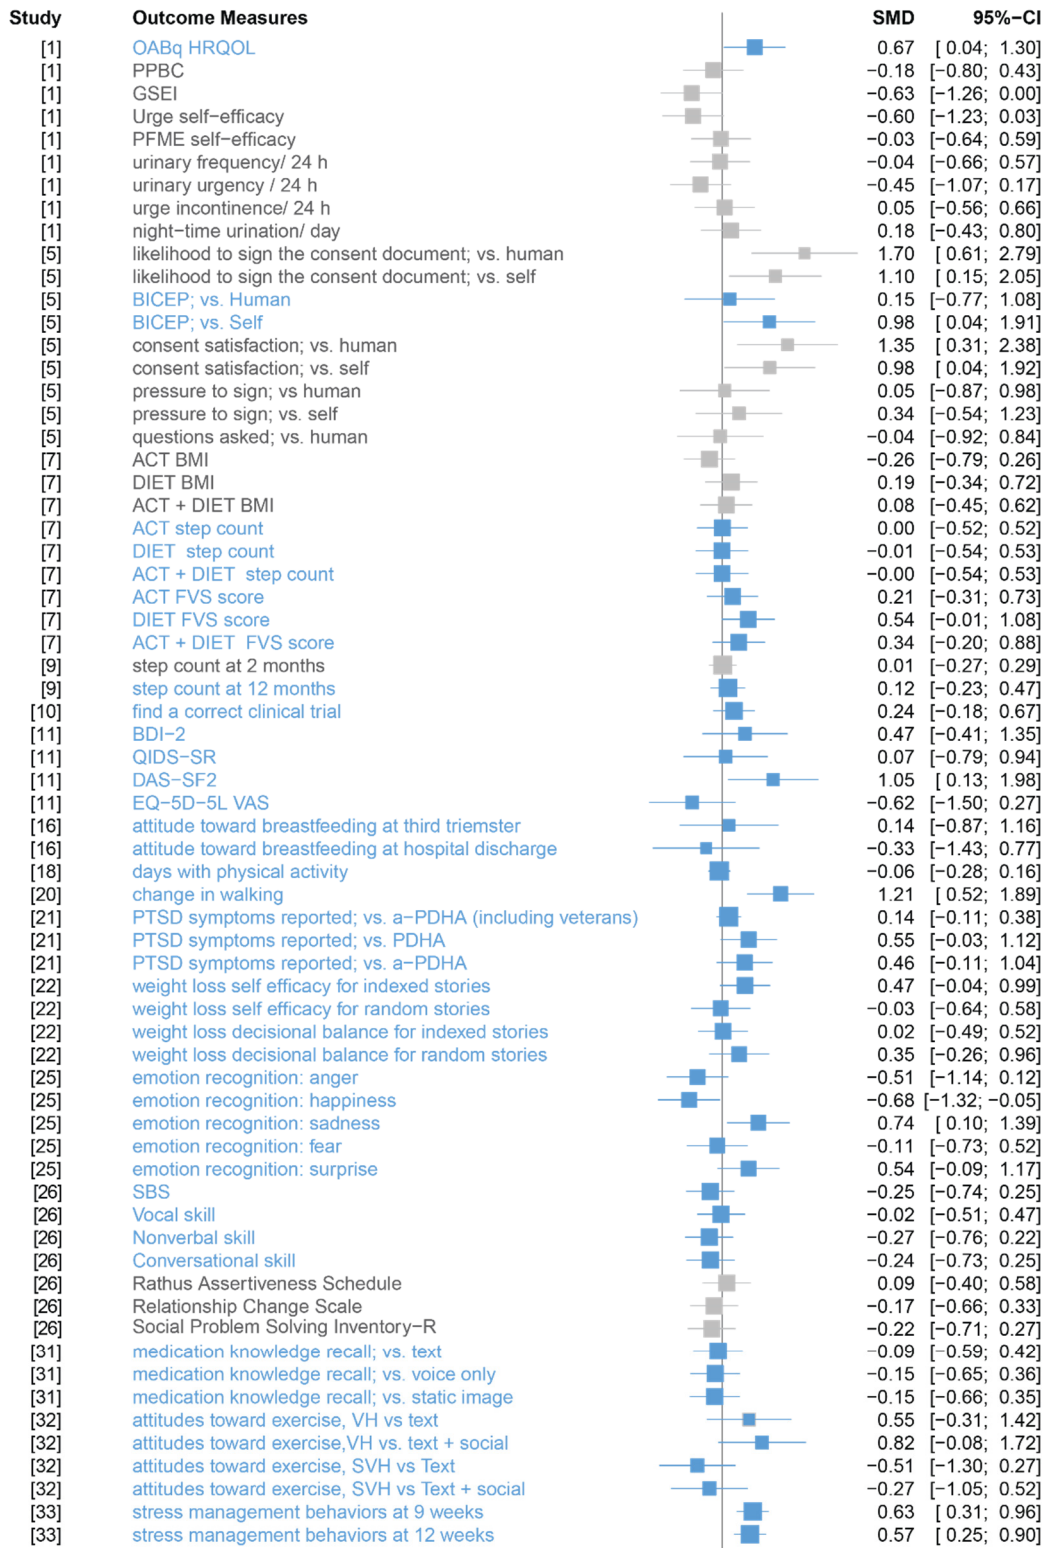

Random effects model  
Heterogeneity:  $I^2 = 49\%$

← no virtual human better      virtual human better →  
0.13 [0.02; 0.25]

-2 -1 0 1 2



## References

1. Andrade AD, Anam R, Karanam C, Downey P, Ruiz JG. An Overactive Bladder Online Self-management Program With Embedded Avatars: A Randomized Controlled Trial of Efficacy. *Urology*. 2015;85(3):561-567.
2. Coyne K, Revicki D, Hunt T, et al. Psychometric validation of an overactive bladder symptom and health-related quality of life questionnaire: the OAB-q. *Quality of life research*. 2002;11(6):563-574.
3. Coyne KS, Matza LS, Kopp Z, Abrams P. The Validation of the Patient Perception of Bladder Condition (PPBC): A Single-Item Global Measure for Patients with Overactive Bladder. *European Urology*. 2006;49(6):1079-1086.
4. Tannenbaum C, Brouillette J, Korner-Bitensky N, et al. Creation and Testing of the Geriatric Self-Efficacy Index for Urinary Incontinence. *Journal of the American Geriatrics Society*. 2008;56(3):542-547.
5. Bickmore TW, Pfeifer LM, Paasche-Orlow MK. Using computer agents to explain medical documents to patients with low health literacy. *Patient Education and Counseling*. 2009;75(3):315-320.
6. Sugarman J, Lavori PW, Boeger M, et al. Evaluating the quality of informed consent. *Clinical Trials: Journal of the Society for Clinical Trials*. 2005;2(1):34-41.
7. Bickmore TW, Schulman D, Sidner C. Automated interventions for multiple health behaviors using conversational agents. *Patient Education and Counseling*. 2013;92(2):142-148.
8. Thompson F, Subar A, Radimer K, et al. Performance of two new cognitively enhanced fruit and vegetable short assessment forms. Paper presented at: Proceedings of the fourth international conference on dietary assessment methods2000.
9. Bickmore TW, Silliman RA, Nelson K, et al. A Randomized Controlled Trial of an Automated Exercise Coach for Older Adults. *Journal of the American Geriatrics Society*. 2013;61(10):1676-1683.
10. Bickmore TW, Utami D, Matsuyama R, Paasche-Orlow MK. Improving Access to Online Health Information With Conversational Agents: A Randomized Controlled Experiment. *Journal of Medical Internet Research*. 2016;18(1):e1.
11. Burton C, Szentagotai Tatar A, McKinstry B, et al. Pilot randomised controlled trial of Help4Mood, an embodied virtual agent-based system to support treatment of depression. *Journal of Telemedicine and Telecare*. 2016;22(6):348-355.
12. Beck AT, Steer RA, Brown G. Beck Depression Inventory–II. In. *PsycTESTS Dataset*: American Psychological Association (APA); 1996.
13. Rush AJ, Trivedi MH, Ibrahim HM, et al. The 16-Item quick inventory of depressive symptomatology (QIDS), clinician rating (QIDS-C), and self-report (QIDS-SR): a psychometric evaluation in patients with chronic major depression. *Biological Psychiatry*. 2003;54(5):573-583.
14. Beevers CG, Strong DR, Meyer B, Pilkonis PA, Miller IW. Efficiently assessing negative cognition in depression: An item response theory analysis of the Dysfunctional Attitude Scale. *Psychological Assessment*. 2007;19(2):199-209.

15. Herdman M, Gudex C, Lloyd A, et al. Development and preliminary testing of the new five-level version of EQ-5D (EQ-5D-5L). *Quality of Life Research*. 2011;20(10):1727-1736.
16. Edwards RA, Bickmore T, Jenkins L, Foley M, Manjourides J. Use of an Interactive Computer Agent to Support Breastfeeding. *Maternal and Child Health Journal*. 2013;17(10):1961-1968.
17. Mora Adl, Russell DW, Dungy CI, Losch M, Dusdieker L. The Iowa Infant Feeding Attitude Scale: Analysis of Reliability and Validity<sup>1</sup>. *Journal of Applied Social Psychology*. 1999;29(11):2362-2380.
18. Friederichs S, Bolman C, Oenema A, Guyaux J, Lechner L. Motivational Interviewing in a Web-Based Physical Activity Intervention With an Avatar: Randomized Controlled Trial. *Journal of Medical Internet Research*. 2014;16(2):e48.
19. Wendel-Vos G. Reproducibility and relative validity of the short questionnaire to assess health-enhancing physical activity. *Journal of Clinical Epidemiology*. 2003;56(12):1163-1169.
20. King AC, Bickmore TW, Campero MI, Pruitt LA, Yin JL. Employing Virtual Advisors in Preventive Care for Underserved Communities: Results From the COMPASS Study. *Journal of Health Communication*. 2013;18(12):1449-1464.
21. Lucas GM, Rizzo A, Gratch J, et al. Reporting Mental Health Symptoms: Breaking Down Barriers to Care with Virtual Human Interviewers. *Frontiers in Robotics and AI*. 2017;4.
22. Manuvinakurike R, Velicer WF, Bickmore TW. Automated Indexing of Internet Stories for Health Behavior Change: Weight Loss Attitude Pilot Study. *Journal of Medical Internet Research*. 2014;16(12):e285.
23. Luszczynska A, Scholz U, Schwarzer R. The General Self-Efficacy Scale: Multicultural Validation Studies. *The Journal of Psychology*. 2005;139(5):439-457.
24. O'Connell D, Velicer WF. A Decisional Balance Measure and the Stages of Change Model for Weight Loss. *International Journal of the Addictions*. 1988;23(7):729-750.
25. Marcos-Pablos S, González-Pablos E, Martín-Lorenzo C, Flores LA, Gómez-García-Bermejo J, Zalama E. Virtual Avatar for Emotion Recognition in Patients with Schizophrenia: A Pilot Study. *Frontiers in Human Neuroscience*. 2016;10.
26. Park K-M, Ku J, Choi S-H, et al. A virtual reality application in role-plays of social skills training for schizophrenia: A randomized, controlled trial. *Psychiatry Research*. 2011;189(2):166-172.
27. Trower P, Bryant B, Argyle M. *Social skills and mental health*. University of Pittsburgh Press; 1978.
28. Rathus SA. A 30-item schedule for assessing assertive behavior. *Behavior Therapy*. 1973;4(3):398-406.
29. Schlein S, Guernsey B. The relationship change scale (RCS). *Pennsylvania State University*. 1977.
30. D'Zurilla TJ, Nezu AM, Maydeu-Olivares A. Social Problem-Solving Inventory - Revised. In. *PsycTESTS Dataset*: American Psychological Association (APA); 2012.
31. Ruiz JG, Andrade AD, Anam R, Lisigurski M, Karanam C, Sharit J. Computer-Based Programmed Instruction Did Not Improve the Knowledge Retention of Medication

- Instructions of Individuals With Type 2 Diabetes Mellitus. *The Diabetes Educator*. 2013;40(1):77-88.
32. Schulman D, Bickmore T. Persuading users through counseling dialogue with a conversational agent. Proceedings of the 4th International Conference on Persuasive Technology - Persuasive '09; 2009.
  33. Shamekhi A, Bickmore T, Lestoquoy A, Gardiner P. Augmenting Group Medical Visits with Conversational Agents for Stress Management Behavior Change. In. *Persuasive Technology: Development and Implementation of Personalized Technologies to Change Attitudes and Behaviors*: Springer International Publishing; 2017:55-67.
